# Supplementary material for: Knowledge–Behavior Gap in Tap Water Consumption in Puerto Rico: Implications for Water Utilities
Source: Atypon-hosted journal article supplement (doi:10.1061/aomjah.aoeng-0005), 2023-09-12
Supplement: supplemental materials_aomjah.aoeng-0005_nelson.pdf [file supplemental%20materials_aomjah.aoeng-0005_nelson.pdf]

## SUPPLEMENTAL MATERIALS

*ASCE OPEN: Multidisciplinary Journal of Civil Engineering*

# Knowledge–Behavior Gap in Tap Water Consumption in Puerto Rico: Implications for Water Utilities

Toby N. T. Nelson, Cristina Poleacovschi, Kaoru Ikuma, Ivis García, Carl F. Weems, Chris R. Rehmann, and Kyle Estes

**DOI:** 10.1061/AOMJAH.AOENG-0005

© ASCE 2023

[www.ascelibrary.org](http://www.ascelibrary.org)

## Appendix S1. Interview and Survey Sample (English)

---

Iowa State University is conducting a survey sponsored by the U.S. Environmental Protection Agency. The survey includes questions about drinking water practices and perceptions after disasters such as Hurricane Maria. The survey will take about 1 hour of your time to complete. We offer **\$25 Walmart Gift Cards as a token of our appreciation**. The information collected will be kept confidential, and it will only be used for academic purposes. **You may skip any question you do not wish to answer in the survey. Your participation in this survey is entirely voluntary and anonymous.** Participants **MUST** be 18 years or older.

Are you or someone in this house more than 18 years old?

- No – Sorry, you do not qualify for the study. Can you refer me to someone in this neighborhood 18 years or older who might be interested?
- Yes – Would you be interested in participating?
  - No – Can you refer me to someone in this neighborhood who might be interested?
  - Yes – Proceed.

If you have any questions or concerns regarding confidentiality or the study, don't hesitate to contact

or

. Thank you for your time!

---

### PUBLIC PERCEPTIONS, ATTITUDE, KNOWLEDGE, AND AWARENESS

---

1. My household address is:
  - a) Street 1: \_\_\_\_\_
  - b) Street 2 (Apt. etc.) \_\_\_\_\_
  - c) City \_\_\_\_\_
  - d) State \_\_\_\_\_
  - e) Zip code \_\_\_\_\_
  - f) GPS Coordinates (to be filled out by researcher) \_\_\_\_\_
  - g) Water Sample ID (to be filled out by researcher) \_\_\_\_\_
2. Do you get potable/drinking water services from the Puerto Rico Aqueduct and Sewer Authority (PRASA)?  
(1) Yes; (2) No; (3) I don't know
3. How long have you had potable water service from the Puerto Rico Aqueduct and Sewer Authority (PRASA)? (1) 1 to 5 years; (2) 6 to 10 years; (3) More than 10 years; (4) I don't know
4. Do you drink water from a tap water source?  
(1) Yes, (2) No
5. If no, why do you not drink water from a tap water source?  
\_\_\_\_\_
6. If yes, the frequency with which you drink tap water daily is?  
(1) Never; (2) Rarely (1 – 2 glasses); (3) Sometimes (3 – 4 glasses); (4) Often (4 to 5 glasses); (5) Always (More than 5 glasses)

7. **Do you trust water from the tap water source?**

(1) Yes, (2) No

8. **If yes to Q7, why do you trust tap water?**

---

9. **If no to Q7, why do you mistrust tap water?**

---

10. **If you do not trust tap water, what do you do to make it more feasible to drink?**

---

11. **How do you get information about this process [related to Q10]?**

---

12. **Do you drink water from a filtered tap water source?**

(1) Yes, (2) No

13. **If no, why do you not drink water from a filtered tap water source?**

---

14. **If yes, the frequency with which you drink filtered tap water daily is?**

(1) Never; (2) Rarely (1 – 2 glasses); (3) Sometimes (3 – 4 glasses); (4) Often (4 to 5 glasses); (5) Always (More than 5 glasses)

15. **Do you trust water from the filtered tap water source?**

(1) Yes, (2) No

16. **If yes to Q15, why do you trust filtered tap water sources?**

---

17. **If no to Q15, why do you mistrust filtered tap water sources?**

---

18. **If you do not trust filtered tap water sources, what do you do to make it more feasible to drink?**

---

19. **How do you get information about this process [related to Q18]?**

---

20. **Do you drink water from a well water source?**

(1) Yes, (2) No

21. **If no, why do you not drink water from a well water source?**  
\_\_\_\_\_
22. **If yes, the frequency with which you drink well water daily is?**  
**(1) Never; (2) Rarely (1 – 2 glasses); (3) Sometimes (3 – 4 glasses); (4) Often (4 to 5 glasses); (5) Always (More than 5 glasses)**
23. **Do you trust water from the well water source?**  
**(1) Yes, (2) No**
24. **If yes to Q23, why do you trust well water sources?**  
\_\_\_\_\_
25. **If no to Q23, why do you mistrust well water sources?**  
\_\_\_\_\_
26. **If you do not trust well water sources, what do you do to make it more feasible?**  
\_\_\_\_\_
27. **How do you get information about this process [related to Q27]?**  
\_\_\_\_\_
28. **Do you drink water from a bottled water source?**  
**(1) Yes, (2) No**
29. **If no, why do you not drink water from a bottled water source?**  
\_\_\_\_\_
30. **If yes, the frequency with which you drink bottled water daily is?**  
**(1) Never; (2) Rarely (1 – 2 glasses); (3) Sometimes (3 – 4 glasses); (4) Often (4 to 5 glasses); (5) Always (More than 5 glasses)**
31. **Do you trust water from the bottled water source?**  
**(1) Yes, (2) No**
32. **If yes to Q31, why do you trust bottled water sources?**  
\_\_\_\_\_
33. **If no to Q31, why do you mistrust bottled water sources?**  
\_\_\_\_\_
34. **If you do not trust bottled water sources, what do you do to make it more feasible to drink?**  
\_\_\_\_\_

35. **How do you get information about this process [related to Q34]?**  
\_\_\_\_\_
36. **Do you drink water from a harvested rainwater source?**  
(1) Yes, (2) No
37. **If no, why do you not drink water from a harvested rainwater source?**  
\_\_\_\_\_
38. **If yes, the frequency with which you drink harvested rainwater is?**  
(1) Never; (2) Rarely (1 – 2 glasses); (3) Sometimes (3 – 4 glasses); (4) Often (4 to 5 glasses); (5) Always (More than 5 glasses)
39. **Do you trust water from the harvested rainwater source?**  
(1) Yes, (2) No
40. **If yes to Q39, why do you trust harvested rainwater sources?**  
\_\_\_\_\_
41. **If no to Q39, why do you mistrust harvested rainwater sources?**  
\_\_\_\_\_
42. **If you do not trust harvested rainwater sources, what do you do to make it more feasible to drink?**  
\_\_\_\_\_
43. **How do you get information about this process [related to Q42]?**  
\_\_\_\_\_
44. **Do you drink water from a stream/river source?**  
(1) Yes, (2) No
45. **If yes, the frequency with which you drink stream/river water is?**  
(1) Never; (2) Rarely (1 – 2 glasses); (3) Sometimes (3 – 4 glasses); (4) Often (4 to 5 glasses); (5) Always (More than 5 glasses)
46. **If no, why do you not drink water from a stream/river water source?**  
\_\_\_\_\_
47. **Do you trust water from the stream/river source?**  
(1) Yes, (2) No
48. **If yes to Q47, why do you trust stream/river water sources?**  
\_\_\_\_\_

49. If no to Q47, why do you mistrust stream/river water sources?

\_\_\_\_\_

50. If you do not trust stream/river water, what do you do to make it more feasible to drink?

\_\_\_\_\_

51. How do you get information about this process [related to Q50]?

\_\_\_\_\_

52. We would like to know your water drinking practices before/after Hurricane Maria; please indicate the following about sources of drinking water:

| Please indicate your primary source of drinking water | Before Hurricane Maria |                       |
|-------------------------------------------------------|------------------------|-----------------------|
|                                                       | YES                    | NO                    |
| Tap Water                                             | <input type="radio"/>  | <input type="radio"/> |
| Filtered Tap Water (Please mention brand): _____      | <input type="radio"/>  | <input type="radio"/> |
| Well Water                                            | <input type="radio"/>  | <input type="radio"/> |
| Bottle Water (Please mention brand): _____            | <input type="radio"/>  | <input type="radio"/> |
| Harvested Rain Water                                  | <input type="radio"/>  | <input type="radio"/> |
| Stream / River                                        | <input type="radio"/>  | <input type="radio"/> |
| Other: Please Specify _____                           | <input type="radio"/>  | <input type="radio"/> |

| Please indicate your primary source of drinking water | After Hurricane Maria |                       |
|-------------------------------------------------------|-----------------------|-----------------------|
|                                                       | YES                   | NO                    |
| Tap Water                                             | <input type="radio"/> | <input type="radio"/> |
| Filtered Tap Water (Please mention brand): _____      | <input type="radio"/> | <input type="radio"/> |
| Well Water                                            | <input type="radio"/> | <input type="radio"/> |
| Bottle Water (Please mention brand): _____            | <input type="radio"/> | <input type="radio"/> |
| Harvested Rain Water                                  | <input type="radio"/> | <input type="radio"/> |
| Stream / River                                        | <input type="radio"/> | <input type="radio"/> |
| Other: Please Specify _____                           | <input type="radio"/> | <input type="radio"/> |

53. How long did it take for your tap water services from the Puerto Rico Aqueduct and Sewer Authority (PRASA) to be restored after Hurricane Maria? Please tell us the Month and Year

\_\_\_\_\_

54. If Q53 includes [YES – NO] combination, Please tell us why you stopped using these water sources after Hurricane Maria

---

---

---

---

---

---

55. If Q53 includes [YES – YES] combination, Please tell us why you continued using these water sources after Hurricane Maria

---

---

---

---

---

---

56. If Q53 includes [NO – YES] combination, Please tell us why you started using these water sources after Hurricane Maria

---

---

---

---

---

---

57. Based on your experience with tap water, please indicate your opinion on the following statements:

| Water Quality Perception Variables                                                                            | Not at all            | Very small degree     | Small degree          | Moderate degree       | Great degree          | Very great degree     |
|---------------------------------------------------------------------------------------------------------------|-----------------------|-----------------------|-----------------------|-----------------------|-----------------------|-----------------------|
| Tap water is usually of high quality.                                                                         | <input type="radio"/> |
| There are health risks associated with drinking water in my home from my tap.                                 | <input type="radio"/> |
| I am happy with the taste of my tap water.                                                                    | <input type="radio"/> |
| I am happy with the color of my tap water.                                                                    | <input type="radio"/> |
| I am happy with the smell of my tap water.                                                                    | <input type="radio"/> |
| The water pipes and taps of my home are clean and well maintained.                                            | <input type="radio"/> |
| Some friends told me negative comments regarding my tap water.                                                | <input type="radio"/> |
| Some family members told me negative comments regarding my tap water.                                         | <input type="radio"/> |
| Tap water has caused health problems for me or for someone in my family.                                      | <input type="radio"/> |
| I trust my water service company (i.e., AAA/PRASA).                                                           | <input type="radio"/> |
| I am used to my tap water.                                                                                    | <input type="radio"/> |
| I am satisfied with the tap water pressure in my home.                                                        | <input type="radio"/> |
| My tap water is contaminated with lead or any chemicals.                                                      | <input type="radio"/> |
| My tap water has too much chlorine.                                                                           | <input type="radio"/> |
| My tap water has too much limescale.                                                                          | <input type="radio"/> |
| My tap water is too hard                                                                                      | <input type="radio"/> |
| I am worried about the quality of water and water contamination (e.g., chemicals) during the hurricane season | <input type="radio"/> |
| I am worried about the quality of water and water contamination (e.g., chemicals) after the hurricane season  | <input type="radio"/> |



58. **How was your water quality before Hurricane Maria?**  
**(1)** No noticeable change; **(2)** my water quality was very bad; **(3)** my water quality was bad; **(4)** my water quality was good; **(5)** my water quality is very good.
59. **How was your water quality during the Hurricane Maria season?**  
**(1)** No noticeable change; **(2)** my water quality was very bad; **(3)** my water quality was bad; **(4)** my water quality was good; **(5)** my water quality was very good.
60. **How has your water quality changed after Hurricane Maria?**  
**(1)** No noticeable change; **(2)** my water quality is very bad; **(3)** my water quality is bad; **(4)** my water quality is good; **(5)** my water quality is very good.
61. **Based on the usage of water in your household, please indicate your opinion on the following statements:**

| Adapted from HWISE Scale                                                                                                                                                                                                                   | Never<br>(0<br>times) | Rarely<br>(1 – 2<br>times) | Sometimes<br>(3 – 10<br>times) | Often<br>(11 – 20<br>times) | Always<br>(more<br>than 20<br>times) |
|--------------------------------------------------------------------------------------------------------------------------------------------------------------------------------------------------------------------------------------------|-----------------------|----------------------------|--------------------------------|-----------------------------|--------------------------------------|
| I worry about not having enough water for all of my household needs.                                                                                                                                                                       | <input type="radio"/> | <input type="radio"/>      | <input type="radio"/>          | <input type="radio"/>       | <input type="radio"/>                |
| My tap water source has been interrupted or limited (e.g., water pressure, less water than expected).                                                                                                                                      | <input type="radio"/> | <input type="radio"/>      | <input type="radio"/>          | <input type="radio"/>       | <input type="radio"/>                |
| I could not wash my clothes because of problems with water quantity.                                                                                                                                                                       | <input type="radio"/> | <input type="radio"/>      | <input type="radio"/>          | <input type="radio"/>       | <input type="radio"/>                |
| I had to change schedules or plans due to problems with my water situation. (Activities that may have been interrupted include caring for others, doing household chores, agricultural work, income-generating activities, sleeping, etc.) | <input type="radio"/> | <input type="radio"/>      | <input type="radio"/>          | <input type="radio"/>       | <input type="radio"/>                |
| I had to change what was being eaten in my household because there were problems with water quantity (e.g., for washing foods, cooking, etc.)                                                                                              | <input type="radio"/> | <input type="radio"/>      | <input type="radio"/>          | <input type="radio"/>       | <input type="radio"/>                |
| I had to go without washing hands after dirty activities (e.g., defecating or changing diapers, cleaning animal dung) because of problems with water quantity.                                                                             | <input type="radio"/> | <input type="radio"/>      | <input type="radio"/>          | <input type="radio"/>       | <input type="radio"/>                |
| I had to go without bathing because of problems with water quantity (e.g., not enough water)                                                                                                                                               | <input type="radio"/> | <input type="radio"/>      | <input type="radio"/>          | <input type="radio"/>       | <input type="radio"/>                |
| There has not been as much water to drink as I would like for me, and my household                                                                                                                                                         | <input type="radio"/> | <input type="radio"/>      | <input type="radio"/>          | <input type="radio"/>       | <input type="radio"/>                |
| I feel angry about my water quantity situation.                                                                                                                                                                                            | <input type="radio"/> | <input type="radio"/>      | <input type="radio"/>          | <input type="radio"/>       | <input type="radio"/>                |
| I have gone to sleep thirsty because there wasn't any water to drink.                                                                                                                                                                      | <input type="radio"/> | <input type="radio"/>      | <input type="radio"/>          | <input type="radio"/>       | <input type="radio"/>                |
| There has been no useable or drinkable tap water whatsoever in my household.                                                                                                                                                               | <input type="radio"/> | <input type="radio"/>      | <input type="radio"/>          | <input type="radio"/>       | <input type="radio"/>                |
| I feel ashamed/excluded/stigmatized because of the water quantity situation in my household                                                                                                                                                | <input type="radio"/> | <input type="radio"/>      | <input type="radio"/>          | <input type="radio"/>       | <input type="radio"/>                |

62. Based on the usage of water in your homes, please indicate your opinion on the following statements:

|                                                                                                                         | Yes (1)               | No (2)                | I do not know (3)     |
|-------------------------------------------------------------------------------------------------------------------------|-----------------------|-----------------------|-----------------------|
| I had a water leak in my household that required a repair after a disaster (e.g., Hurricane Maria)                      | <input type="radio"/> | <input type="radio"/> | <input type="radio"/> |
| I have an ongoing leak INSIDE my house after a disaster (e.g., Hurricane Maria)                                         | <input type="radio"/> | <input type="radio"/> | <input type="radio"/> |
| I have had a water leak outside of my house in the yard that required a repair after a disaster (e.g., Hurricane Maria) | <input type="radio"/> | <input type="radio"/> | <input type="radio"/> |
| I have had an ongoing leak OUTSIDE my house after a disaster (e.g., Hurricane Maria)                                    | <input type="radio"/> | <input type="radio"/> | <input type="radio"/> |

63. Based on your health and wellness, please indicate your opinion on the following statements:

| CD-RISC 10 Resilience Scale                      | Strongly Disagree     | Somewhat Disagree     | Neither Agree nor Disagree | Somewhat Agree        | Strongly Agree        |
|--------------------------------------------------|-----------------------|-----------------------|----------------------------|-----------------------|-----------------------|
| I can adapt to change.                           | <input type="radio"/> | <input type="radio"/> | <input type="radio"/>      | <input type="radio"/> | <input type="radio"/> |
| I can deal with whatever comes.                  | <input type="radio"/> | <input type="radio"/> | <input type="radio"/>      | <input type="radio"/> | <input type="radio"/> |
| I try to see the humorous side of things.        | <input type="radio"/> | <input type="radio"/> | <input type="radio"/>      | <input type="radio"/> | <input type="radio"/> |
| I believe stress can strengthen me.              | <input type="radio"/> | <input type="radio"/> | <input type="radio"/>      | <input type="radio"/> | <input type="radio"/> |
| I tend to bounce back after illness or hardship. | <input type="radio"/> | <input type="radio"/> | <input type="radio"/>      | <input type="radio"/> | <input type="radio"/> |
| I can achieve goals despite obstacles.           | <input type="radio"/> | <input type="radio"/> | <input type="radio"/>      | <input type="radio"/> | <input type="radio"/> |
| I can stay focused under pressure.               | <input type="radio"/> | <input type="radio"/> | <input type="radio"/>      | <input type="radio"/> | <input type="radio"/> |
| I am not easily discouraged by failure.          | <input type="radio"/> | <input type="radio"/> | <input type="radio"/>      | <input type="radio"/> | <input type="radio"/> |
| I think of myself as a strong person.            | <input type="radio"/> | <input type="radio"/> | <input type="radio"/>      | <input type="radio"/> | <input type="radio"/> |
| I can handle unpleasant feelings.                | <input type="radio"/> | <input type="radio"/> | <input type="radio"/>      | <input type="radio"/> | <input type="radio"/> |

64. Based on your health and wellness, please indicate your opinion on the following statements:

| Center for Epidemiologic Studies Depression (CES-D) Items                             | Strongly Disagree     | Somewhat Disagree     | Neither Agree nor Disagree | Somewhat Agree        | Strongly Agree        |
|---------------------------------------------------------------------------------------|-----------------------|-----------------------|----------------------------|-----------------------|-----------------------|
| I was bothered by things that usually don't bother me.                                | <input type="radio"/> | <input type="radio"/> | <input type="radio"/>      | <input type="radio"/> | <input type="radio"/> |
| I did not feel like eating; my appetite was poor.                                     | <input type="radio"/> | <input type="radio"/> | <input type="radio"/>      | <input type="radio"/> | <input type="radio"/> |
| I felt that I could not shake off the blues even with help from my family or friends. | <input type="radio"/> | <input type="radio"/> | <input type="radio"/>      | <input type="radio"/> | <input type="radio"/> |
| I felt I was just as good as other people.                                            | <input type="radio"/> | <input type="radio"/> | <input type="radio"/>      | <input type="radio"/> | <input type="radio"/> |
| I had trouble keeping my mind on what I was doing.                                    | <input type="radio"/> | <input type="radio"/> | <input type="radio"/>      | <input type="radio"/> | <input type="radio"/> |
| I felt depressed.                                                                     | <input type="radio"/> | <input type="radio"/> | <input type="radio"/>      | <input type="radio"/> | <input type="radio"/> |
| I felt that everything I did was an effort.                                           | <input type="radio"/> | <input type="radio"/> | <input type="radio"/>      | <input type="radio"/> | <input type="radio"/> |
| I felt hopeful about the future.                                                      | <input type="radio"/> | <input type="radio"/> | <input type="radio"/>      | <input type="radio"/> | <input type="radio"/> |
| I thought my life had been a failure.                                                 | <input type="radio"/> | <input type="radio"/> | <input type="radio"/>      | <input type="radio"/> | <input type="radio"/> |
| I felt fearful.                                                                       | <input type="radio"/> | <input type="radio"/> | <input type="radio"/>      | <input type="radio"/> | <input type="radio"/> |
| My sleep was restless.                                                                | <input type="radio"/> | <input type="radio"/> | <input type="radio"/>      | <input type="radio"/> | <input type="radio"/> |
| I was happy.                                                                          | <input type="radio"/> | <input type="radio"/> | <input type="radio"/>      | <input type="radio"/> | <input type="radio"/> |
| I talk less than usual.                                                               | <input type="radio"/> | <input type="radio"/> | <input type="radio"/>      | <input type="radio"/> | <input type="radio"/> |
| I felt lonely.                                                                        | <input type="radio"/> | <input type="radio"/> | <input type="radio"/>      | <input type="radio"/> | <input type="radio"/> |
| People were unfriendly.                                                               | <input type="radio"/> | <input type="radio"/> | <input type="radio"/>      | <input type="radio"/> | <input type="radio"/> |
| I enjoyed life.                                                                       | <input type="radio"/> | <input type="radio"/> | <input type="radio"/>      | <input type="radio"/> | <input type="radio"/> |
| I had crying spells.                                                                  | <input type="radio"/> | <input type="radio"/> | <input type="radio"/>      | <input type="radio"/> | <input type="radio"/> |
| I felt sad.                                                                           | <input type="radio"/> | <input type="radio"/> | <input type="radio"/>      | <input type="radio"/> | <input type="radio"/> |
| I felt that people disliked me.                                                       | <input type="radio"/> | <input type="radio"/> | <input type="radio"/>      | <input type="radio"/> | <input type="radio"/> |
| I could not get going.                                                                | <input type="radio"/> | <input type="radio"/> | <input type="radio"/>      | <input type="radio"/> | <input type="radio"/> |

65. Based on your understanding of community water experiences, please indicate your opinion on the following statements:

| Adapted from ShoCCS                                                                                                                                                            | Strongly Disagree     | Somewhat Disagree     | Neither Agree nor Disagree | Somewhat Agree        | Strongly Agree        |
|--------------------------------------------------------------------------------------------------------------------------------------------------------------------------------|-----------------------|-----------------------|----------------------------|-----------------------|-----------------------|
| Certain racial or ethnic groups have fewer chances to access high-quality potable drinking water without service interruptions.                                                | <input type="radio"/> | <input type="radio"/> | <input type="radio"/>      | <input type="radio"/> | <input type="radio"/> |
| Low-income communities have fewer opportunities to access high-quality potable drinking water without service interruptions.                                                   | <input type="radio"/> | <input type="radio"/> | <input type="radio"/>      | <input type="radio"/> | <input type="radio"/> |
| Women have fewer opportunities to access high-quality potable drinking water without service interruptions.                                                                    | <input type="radio"/> | <input type="radio"/> | <input type="radio"/>      | <input type="radio"/> | <input type="radio"/> |
| Older adults (65 years and older) have fewer chances to access high-quality potable drinking water without service interruptions.                                              | <input type="radio"/> | <input type="radio"/> | <input type="radio"/>      | <input type="radio"/> | <input type="radio"/> |
| I have participated in a civil rights group or organization to advocate for improving access to high-quality potable drinking water without service interruptions.             | <input type="radio"/> | <input type="radio"/> | <input type="radio"/>      | <input type="radio"/> | <input type="radio"/> |
| I have participated in an organization to advocate for improving access to high-quality potable drinking water without service interruptions.                                  | <input type="radio"/> | <input type="radio"/> | <input type="radio"/>      | <input type="radio"/> | <input type="radio"/> |
| I have contacted a public official by phone, mail, or email to tell them how you felt about access to high-quality potable drinking water without service interruptions.       | <input type="radio"/> | <input type="radio"/> | <input type="radio"/>      | <input type="radio"/> | <input type="radio"/> |
| I joined a protest march, political demonstration, or political meeting to advocate for improving access to high-quality potable drinking water without service interruptions. | <input type="radio"/> | <input type="radio"/> | <input type="radio"/>      | <input type="radio"/> | <input type="radio"/> |
| It is important to be an active and informed citizen on water issues such as access to high-quality potable drinking water without service interruptions.                      | <input type="radio"/> | <input type="radio"/> | <input type="radio"/>      | <input type="radio"/> | <input type="radio"/> |
| It is important to correct social and economic inequality related to access to high-quality potable drinking water without service interruptions.                              | <input type="radio"/> | <input type="radio"/> | <input type="radio"/>      | <input type="radio"/> | <input type="radio"/> |
| My responsibility is to get involved and make things better for my society's access to high-quality potable drinking water without service interruptions.                      | <input type="radio"/> | <input type="radio"/> | <input type="radio"/>      | <input type="radio"/> | <input type="radio"/> |
| People like me should participate in the political activity and decision-making of our country's access to high-quality potable drinking water without service interruptions.  | <input type="radio"/> | <input type="radio"/> | <input type="radio"/>      | <input type="radio"/> | <input type="radio"/> |

66. **Do you have a metered connection for your water service from the Puerto Rico Aqueduct and Sewer Authority (PRASA)?** (1) Yes; (2) No; (3) I don't know
67. **Are you responsible for your water utility bill?** (1) Yes; (2) No; (3) I don't know
68. **Do you pay a flat rate for your water services from the Puerto Rico Aqueduct and Sewer Authority (PRASA)?** (1) Yes; (2) No; (3) I don't know
69. **How much do you pay every month (flat-rate) for water service from the Puerto Rico Aqueduct and Sewer Authority?** \_\_\_\_\_dollars
70. **How has your water bill changed in the past decade?** (1) No noticeable change; (2) my water bill has increased; (3) my water bill has decreased
71. **At the current rates, do you worry about having the ability (i.e., having the financial resources) to pay your water bill?**  
(1) Not at all; (2) very small degree; (3) small degree; (4) moderate degree; (5) great degree; (6) very great degree.
72. **How much MORE would you be willing to pay for improved reliability (specifically, pressure and reduced interruption of service) of your WATER service? Please answer "0" if you would not be willing to pay more for your water service for a more reliable system** \_\_\_\_\_ USD increase in current water bill
73. **How much MORE would you be willing to pay for improved quality (smell, color, taste, etc.) of your WATER service? Please answer "0" if you would not be willing to pay more for your water service for a more reliable system** \_\_\_\_\_ USD increase in current water bill
74. **I receive information about water distribution and quality through (choose all that apply)?** (1) Neighbors, family, friends; (2) Neighborhood organizations in my neighborhood (including local church groups); (3) Nonprofits from outside my neighborhood; (4) Local government; (5) Central government; (6) Federal agencies; (7) Flyers/notices around the neighborhood; (8) Newspaper, TV, Radio; (9) Internet (Facebook or other social media) (10) Other, please specify \_\_\_\_\_ (11) I did not receive news
75. **The methods that are effective for providing me with the information about water distribution and quality are (choose all that apply)?**  
(1) Neighbors, family, friends; (2) Neighborhood organizations in my neighborhood (including local church groups); (3) Nonprofits from outside my neighborhood; (4) Local government; (5) Central government; (6) Federal agencies; (7) Flyers/notices around the neighborhood; (8) Newspaper, TV, Radio; (9) Internet (Facebook or other social media) (10) Other, please specify \_\_\_\_\_ (11) I did not receive news
76. **Is the current effectiveness of providing me information about water distribution from the utility?**  
(1) Extremely not effective; (2) Not effective; (3) Neutral; (4) Effective; (5) Very effective; (6) I do not know

77. In addition to the above methods, I would prefer to receive information via (e.g., phone app):

\_\_\_\_\_

---

**DEMOGRAPHIC QUESTIONS**

**Gender:** (1) Female (2) Male (3) Others/ Non-Binary, Please Specify: \_\_\_\_\_

**What is your age?** \_\_\_\_\_

**Are you of Hispanic, Latino, or Spanish origin?**

(1) Not Hispanic, Latino, or Spanish origin; (2) Yes, Puerto Rican; (3) Yes, Haitian; (4) Yes, Dominican; (5) Yes, Cuban; (6) Other (please specify);

**What is your identified race (choose all that apply)?**

(1) American Indian or Alaska Native; (2) Asian; (3) Black or African American; (4) Native Hawaiian or Other Pacific Islander; (5) White; (6) Mixed; (7) Other \_\_\_\_\_

**How long have you lived in this municipality?** \_\_\_\_\_ years

**What is the highest completed level of education?**

(1) No schooling completed; (2) Elementary school degree; (3) Middle school degree; (4) High school diploma or equivalent (for example: GED); (5) Bachelor's degree (for example: BA, BS); (6) Associates degree (for example: AA, AS); (7) Other (please specify) \_\_\_\_\_

**How many people live in your household?** \_\_\_\_\_

**How many children under the age of 18 live in your household?** \_\_\_\_\_

**How many children under the age of 5 live in your household?** \_\_\_\_\_

**How many cars does your household have?** \_\_\_\_\_

**How would you describe your house?**

(1) House; (2) Apartment; (3) Condo; (4) Mobile home/Trailer; (5) Other \_\_\_\_\_

**Is your house...?**

(1) Owned by you or someone in this household with a mortgage or loan; (2) Owned by you or someone in this household free and clear (without a mortgage or loan); (3) Rented; (4) Other \_\_\_\_\_

**Does your house have a property title?**

**(1) Yes; (2) No; (3) I don't know**

**If not, please select the most appropriate**

**(1) Unresolved inheritance (2) Family land without being formally subdivided; (3) Private rescue land; (4) Government land; (5) Other (please specify)**

**Is this the first house you have owned? (1) Yes; (2) No**

**If Yes, and this is the first house you have owned, what is the length of time you have owned this house?**

\_\_\_\_\_years

**What is your approximate monthly income?**

\_\_\_\_\_years

**What is your employment status (choose all that apply)?**

**(1) Employed for wages or salary; (2) Self-Employed; (3) Out of work and looking for work; (4) Out of work but not currently looking for work; (5) A homemaker; (6) A student; (7) Retired; (8) Unable to work**

**What is your primary source of news (choose all that apply)?**

**(1) Newspaper; (2) Internet; (3) Television; (4) Radio; (5) social media; (6) Other \_\_\_\_\_**

**Frequency of following any of the above news sources:**

**(1) At least once per day; (2) At least once per week; (3) At least once per month; (4) Never**

**Do you have any comments or concerns about the water supply and quality in your city?**

## Appendix S2. Interview and Survey Sample (Spanish)

---

La Universidad Estatal de Iowa y la Universidad de Utah está realizando una encuesta patrocinada por la Agencia de Protección Ambiental (Environmental Protection Agency) de los Estados Unidos. La encuesta incluye preguntas sobre prácticas de agua potable y percepciones después de desastres como el huracán María. Completar la encuesta le tomará aproximadamente 1 hora de su tiempo. Ofrecemos **\$25 tarjetas de regalo de Walmart como muestra de nuestro agradecimiento**. La información recopilada se mantendrá confidencial y solo se utilizará con fines académicos. **Puede omitir cualquier pregunta que no desee responder en la encuesta. Su participación en esta encuesta es totalmente voluntaria y anónima.** Los participantes **DEBEN** tener 18 años o más.

¿Usted o alguien en esta casa tiene más de 18 años?

- No – Lo sentimos, no califica para el estudio. ¿Puede recomendarme a alguien en este vecindario mayor de 18 años que pueda estar interesado?
- Sí, ¿le interesaría participar?
  - No. ¿Puede recomendarme a alguien en este vecindario que pueda estar interesado?
  - Sí – Continúe.

Si tiene alguna pregunta o inquietud con respecto a la confidencialidad o el estudio, no dude en comunicarse con la Dra. \_\_\_\_\_ o la Dra. \_\_\_\_\_

\_\_\_\_\_. ¡Gracias por tu tiempo!

---

### PERCEPCIONES PÚBLICAS, ACTITUD, CONOCIMIENTO Y CONCIENCIA

---

1. La dirección de mi casa es:
  - h) Calle 1: \_\_\_\_\_
  - i) Apto. etc. \_\_\_\_\_
  - j) Ciudad \_\_\_\_\_
  - k) País \_\_\_\_\_
  - l) Código postal \_\_\_\_\_
  - m) Coordenadas GPS (a completar por el investigador) \_\_\_\_\_
  - n) Identificación de la muestra de agua (a ser completada por el investigador) \_\_\_\_\_
2. ¿Recibe servicios de agua potable/potable de la Autoridad de Acueductos y Alcantarillados de Puerto Rico (PRASA)? (1) Sí; (2) No; (3) No sé
3. ¿Hace cuánto tiempo tiene el servicio de agua potable de la Autoridad de Acueductos y Alcantarillados de Puerto Rico (AAA)? (1) 1 a 5 años; (2) 6 a 10 años; (3) Más de 10 años; (4) No sé
4. ¿Bebes agua de una fuente de agua de la pluma?  
(1) Sí, (2) No
5. Si no, ¿por qué no bebe agua de una fuente de agua de la pluma?  
\_\_\_\_\_



6. **En caso afirmativo, ¿la frecuencia con la que bebe agua de la pluma diariamente es?**  
(1) Nunca; (2) Rara vez (1 a 2 vasos); (3) A veces (3 a 4 vasos); (4) A menudo (4 a 5 vasos); (5) Siempre (Más de 5 vasos)
7. **¿Confías en el agua de la fuente de agua de la pluma?**  
(1) Sí, (2) No
8. **Si la respuesta a la pregunta 7 es sí, ¿por qué confía en el agua de la pluma?**  
\_\_\_\_\_
9. **Si no a la P7, ¿por qué desconfía del agua de la pluma?**  
\_\_\_\_\_
10. **Si no confías en el agua de la pluma, ¿qué haces para que sea más factible beberla?**  
\_\_\_\_\_
11. **¿Cómo obtiene información sobre este proceso [relacionado con Q10]?**  
\_\_\_\_\_
12. **¿Bebes agua de la pluma filtrada?**  
(1) Sí, (2) No
13. **Si no, ¿por qué no bebe agua de la pluma filtrada?**  
\_\_\_\_\_
14. **En caso afirmativo, ¿con qué frecuencia bebe el agua de la pluma filtrada?**  
(1) Nunca; (2) Rara vez (1 a 2 vasos); (3) A veces (3 – 4 vasos); (4) A menudo (4 a 5 vasos); (5) Siempre (Más de 5 vasos)
15. **¿Confías en el agua de la pluma, pero filtrada?**  
(1) Sí, (2) No
16. **Si la respuesta a la pregunta 15 es sí, ¿por qué confía en el agua de la pluma filtrada?**  
\_\_\_\_\_
17. **Si no a la P15, ¿por qué desconfía de las fuentes de agua de la pluma filtrada?**  
\_\_\_\_\_
18. **Si no confía en las fuentes de agua de la pluma filtrada, ¿qué hace para que sea más factible beberla?**  
\_\_\_\_\_
19. **¿Cómo obtiene información sobre este proceso [relacionado con P18]?**  
\_\_\_\_\_

20. **¿Bebe usted agua de pozo?**

(1) Sí, (2) No

21. **Si no, ¿por qué no bebe agua de pozo?**

---

22. **En caso afirmativo, ¿la frecuencia con la que bebe agua de pozo diariamente es?**

(1) Nunca; (2) Rara vez (1 a 2 vasos); (3) A veces (3 a 4 vasos); (4) A menudo (4 a 5 vasos); (5) Siempre (Más de 5 vasos)

23. **¿Confías en el agua de pozo?**

(1) Sí, (2) No

24. **Si la respuesta a la pregunta 23 es sí, ¿por qué confía en el agua de pozo?**

---

25. **Si no a la P23, ¿por qué desconfía en el agua de pozo?**

---

26. **Si no confía en el agua de pozo, ¿qué hace para que sea más factible?**

---

27. **¿Cómo obtiene información sobre este proceso [relacionado con P27]?**

---

28. **¿Bebes agua embotellada?**

(1) Sí, (2) No

29. **Si no, ¿por qué no bebe agua embotellada?**

---

30. **En caso afirmativo, ¿con qué frecuencia bebe agua embotellada diariamente?**

(1) Nunca; (2) Rara vez (1 a 2 vasos); (3) A veces (3 a 4 vasos); (4) A menudo (4 a 5 vasos); (5) Siempre (Más de 5 vasos)

31. **¿Confías en el agua de la fuente de agua embotellada?**

(1) Sí, (2) No

32. **Si la respuesta a la P31 es sí, ¿por qué confía en agua embotellada?**

---

33. Si no a la P31, ¿por qué desconfía en agua embotellada?
- 
34. Si no confía en agua embotellada, ¿qué hace para que sea más factible beberla?
- 
35. ¿Cómo obtiene información sobre este proceso [relacionado con Q34]?
- 
36. ¿Bebes agua de lluvia recolectada?  
(1) Sí, (2) No
37. Si no, ¿por qué no bebe agua de lluvia recolectada?
- 
38. En caso afirmativo, ¿con qué frecuencia bebe agua de lluvia recolectada?  
(1) Nunca; (2) Rara vez (1 a 2 vasos); (3) A veces (3 a 4 vasos); (4) A menudo (4 a 5 vasos); (5) Siempre (Más de 5 vasos)
39. ¿Confías en el agua de lluvia recolectada?  
(1) Sí, (2) No
40. Si respondió sí a la P39, ¿por qué confía en agua de lluvia recolectada?
- 
41. Si respondió no a la P39, ¿por qué desconfía del agua de lluvia recolectada?
- 
42. Si no confía en agua de lluvia recolectada, ¿qué hace para que sea más factible beberla?
- 
43. ¿Cómo obtiene información sobre este proceso [relacionado con Q42]?
- 
44. ¿Bebes agua de arroyo/río?  
(1) Sí, (2) No
45. En caso afirmativo, ¿con qué frecuencia bebe agua de arroyo/río?  
(1) Nunca; (2) Rara vez (1 a 2 vasos); (3) A veces (3 a 4 vasos); (4) A menudo (4 a 5 vasos); (5) Siempre (Más de 5 vasos)
46. Si no, ¿por qué no bebe agua de arroyo/río?
-

47. ¿Confías en el agua de la fuente del arroyo/río?

(1) Sí, (2) No

48. Si la respuesta a la pregunta 47 es sí, ¿por qué confía en agua de arroyos/ríos?

\_\_\_\_\_

49. Si respondió no a la pregunta 47, ¿por qué desconfía del agua de arroyos/ríos?

\_\_\_\_\_

50. Si no confía en el agua de arroyos/ríos, ¿qué hace para que sea más factible beberla?

\_\_\_\_\_

51. ¿Cómo obtiene información sobre este proceso [relacionado con Q50]?

\_\_\_\_\_

52. Nos gustaría conocer sus prácticas de consumo de agua antes/después del huracán María.

| Indique su principal fuente de agua potable                                                                     | Antes del Huracán María |                       |
|-----------------------------------------------------------------------------------------------------------------|-------------------------|-----------------------|
|                                                                                                                 | SÍ                      | NO                    |
| Agua de la pluma                                                                                                | <input type="radio"/>   | <input type="radio"/> |
| Agua de la pluma, pero filtrada (mencione tipo, ej. destilación, carbon activado, osmosis inversa, etc.): _____ | <input type="radio"/>   | <input type="radio"/> |
| Agua de pozo                                                                                                    | <input type="radio"/>   | <input type="radio"/> |
| Botella de agua (mencione las marcas, ej. aquafina, econo, etc.):<br>_____                                      | <input type="radio"/>   | <input type="radio"/> |
| Agua de lluvia recolectada                                                                                      | <input type="radio"/>   | <input type="radio"/> |
| Arroyo / Río                                                                                                    | <input type="radio"/>   | <input type="radio"/> |
| Otros (especificar _____)                                                                                       | <input type="radio"/>   | <input type="radio"/> |

| Indique su principal fuente de agua potable                                                                     | Después del huracán María |                       |
|-----------------------------------------------------------------------------------------------------------------|---------------------------|-----------------------|
|                                                                                                                 | SÍ                        | NO                    |
| Agua de la pluma                                                                                                | <input type="radio"/>     | <input type="radio"/> |
| Agua de la pluma, pero filtrada (mencione tipo, ej. destilación, carbon activado, osmosis inversa, etc.): _____ | <input type="radio"/>     | <input type="radio"/> |
| Agua de pozo                                                                                                    | <input type="radio"/>     | <input type="radio"/> |
| Botella de agua (mencione las marcas, ej. aquafina, econo, etc.):<br>_____                                      | <input type="radio"/>     | <input type="radio"/> |
| Agua de lluvia recolectada                                                                                      | <input type="radio"/>     | <input type="radio"/> |
| Arroyo / Río                                                                                                    | <input type="radio"/>     | <input type="radio"/> |
| Otros (especificar _____)                                                                                       | <input type="radio"/>     | <input type="radio"/> |

53. ¿Cuánto tiempo tardó en restablecerse el servicio de agua corriente de la Autoridad de Acueductos y Alcantarillados de Puerto Rico (AAA) después del huracán María? Por favor díganos el mes y el año

---

---

54. Si Q53 incluye la combinación [SÍ – NO], díganos por qué dejó de usar estas fuentes de agua después del huracán María

---

---

---

---

---

---

55. Si Q53 incluye la combinación [SÍ – SÍ], díganos por qué siguió usando estas fuentes de agua después del huracán María.

---

---

---

---

---

---

56. Si Q53 incluye la combinación [NO – SÍ], díganos por qué comenzó a usar estas fuentes de agua después del huracán María

---

---

---

---

---

---

57. En base a su experiencia con el agua de la pluma, indique su opinión sobre las siguientes afirmaciones:

| Variables de percepción de la calidad del agua                                                                                   | Para nada             | Un poquito            | Un poco               | Indiferente           | Mucho                 | Muchísimo             |
|----------------------------------------------------------------------------------------------------------------------------------|-----------------------|-----------------------|-----------------------|-----------------------|-----------------------|-----------------------|
| El agua de la pluma suele ser de alta calidad.                                                                                   | <input type="radio"/> |
| Hay riesgos para la salud asociados con beber agua de la pluma de mi casa.                                                       | <input type="radio"/> |
| Estoy feliz con el sabor del agua de mi pluma.                                                                                   | <input type="radio"/> |
| Estoy feliz con el color del agua de mi pluma.                                                                                   | <input type="radio"/> |
| Estoy feliz con el olor del agua de mi pluma.                                                                                    | <input type="radio"/> |
| Las tuberías de agua y la pluma de mi casa están limpias y bien mantenidos.                                                      | <input type="radio"/> |
| Algunos amigos me dijeron comentarios negativos sobre el agua mi pluma.                                                          | <input type="radio"/> |
| Algunos miembros de la familia me dijeron comentarios negativos sobre el agua de mi pluma.                                       | <input type="radio"/> |
| El agua de mi pluma ha causado problemas de salud a mí o a alguien de mi familia.                                                | <input type="radio"/> |
| Confío en mi compañía de servicio de agua (AAA).                                                                                 | <input type="radio"/> |
| Estoy acostumbrado el agua mi pluma.                                                                                             | <input type="radio"/> |
| Estoy satisfecho con la presión del agua de mi pluma.                                                                            | <input type="radio"/> |
| El agua de mi pluma está contaminada con plomo o algún químico.                                                                  | <input type="radio"/> |
| El agua de mi pluma tiene demasiado cloro.                                                                                       | <input type="radio"/> |
| El agua de mi pluma tiene demasiada cal.                                                                                         | <input type="radio"/> |
| El agua de mi pluma es demasiado dura (ej. poca presión, agua turbia, etc.)                                                      | <input type="radio"/> |
| Me preocupa la calidad del agua y la contaminación del agua (ej. productos químicos) <i>durante</i> la temporada de huracanes    | <input type="radio"/> |
| Me preocupa la calidad del agua y la contaminación del agua (ej. productos químicos) <i>después</i> de la temporada de huracanes | <input type="radio"/> |

58. ¿Cómo era la calidad de su agua antes del huracán María?

(1) Ningún cambio notable; (2) la calidad de mi agua era *muy mala*; (3) la calidad de mi agua era *mala*; (4) la calidad de mi agua era *buena*; (5) la calidad de mi agua es *muy buena*.

59. ¿Cómo era la calidad de su agua durante la temporada del huracán María (Julio-Noviembre del 2017)?

(1) Ningún cambio notable; (2) la calidad de mi agua era *muy mala*; (3) la calidad de mi agua era *mala*; (4) la calidad de mi agua era *buena*; (5) la calidad de mi agua es *muy buena*.

60. ¿Cómo cambio la calidad de su agua después del huracán María?

(1) Ningún cambio notable; (2) la calidad de mi agua era *muy mala*; (3) la calidad de mi agua era *mala*; (4) la calidad de mi agua era *buena*; (5) la calidad de mi agua es *muy buena*.

61. Con base en el uso de agua en su hogar, indique su opinión sobre las siguientes afirmaciones:

| Adaptado de la escala experiencias de inseguridad de agua en el hogar (HWISE)                                                                                                                                                                                     | Nunca (0 veces)       | Poco frecuentemente (1 – 2 veces) | Algunas veces (3 – 10 veces) | A menudo (11 – 20 veces) | Siempre (más de 20 veces) |
|-------------------------------------------------------------------------------------------------------------------------------------------------------------------------------------------------------------------------------------------------------------------|-----------------------|-----------------------------------|------------------------------|--------------------------|---------------------------|
| Me preocupa no tener suficiente agua para todas las necesidades de mi hogar.                                                                                                                                                                                      | <input type="radio"/> | <input type="radio"/>             | <input type="radio"/>        | <input type="radio"/>    | <input type="radio"/>     |
| Mi fuente de agua de la pluma ha sido interrumpida o limitada (p. ej., presión de agua, menos agua de lo esperado).                                                                                                                                               | <input type="radio"/> | <input type="radio"/>             | <input type="radio"/>        | <input type="radio"/>    | <input type="radio"/>     |
| No pude lavar mi ropa por problemas con la cantidad de agua.                                                                                                                                                                                                      | <input type="radio"/> | <input type="radio"/>             | <input type="radio"/>        | <input type="radio"/>    | <input type="radio"/>     |
| Tuve que cambiar horarios o planes por problemas con mi situación de agua. (Las actividades que pueden haberse interrumpido incluyen el cuidado de los demás, las tareas domésticas, el trabajo agrícola, las actividades generadoras de ingresos, dormir, etc.). | <input type="radio"/> | <input type="radio"/>             | <input type="radio"/>        | <input type="radio"/>    | <input type="radio"/>     |
| Tuve que cambiar lo que se estaba comiendo en mi hogar porque había problemas con la cantidad de agua (por ejemplo, para lavar alimentos, cocinar, etc.).                                                                                                         | <input type="radio"/> | <input type="radio"/>             | <input type="radio"/>        | <input type="radio"/>    | <input type="radio"/>     |
| Tenía que pasar sin lavarme las manos después de actividades sucias (por ejemplo, defecar o cambiar pañales, limpiar estiércol de animales) por problemas con la cantidad de agua.                                                                                | <input type="radio"/> | <input type="radio"/>             | <input type="radio"/>        | <input type="radio"/>    | <input type="radio"/>     |
| No me bañe debido a problemas con la cantidad de agua (p. ej., no había suficiente agua).                                                                                                                                                                         | <input type="radio"/> | <input type="radio"/>             | <input type="radio"/>        | <input type="radio"/>    | <input type="radio"/>     |
| No ha habido tanta agua para beber como me gustaría para mí y mi hogar.                                                                                                                                                                                           | <input type="radio"/> | <input type="radio"/>             | <input type="radio"/>        | <input type="radio"/>    | <input type="radio"/>     |
| Me siento enojado por mi situación de cantidad de agua.                                                                                                                                                                                                           | <input type="radio"/> | <input type="radio"/>             | <input type="radio"/>        | <input type="radio"/>    | <input type="radio"/>     |
| Me he ido a dormir con sed porque no había agua para beber.                                                                                                                                                                                                       | <input type="radio"/> | <input type="radio"/>             | <input type="radio"/>        | <input type="radio"/>    | <input type="radio"/>     |
| No ha habido agua de pluma utilizable o potable en mi hogar.                                                                                                                                                                                                      | <input type="radio"/> | <input type="radio"/>             | <input type="radio"/>        | <input type="radio"/>    | <input type="radio"/>     |
| Me siento avergonzado/excluido/estigmatizado por la situación de la cantidad de agua en mi hogar.                                                                                                                                                                 | <input type="radio"/> | <input type="radio"/>             | <input type="radio"/>        | <input type="radio"/>    | <input type="radio"/>     |

62. Con base en el uso de agua en su hogar, por favor indique su opinión sobre las siguientes afirmaciones:

|                                                                                                                                    | Sí (1)                | No (2)                | No sé (3)             |
|------------------------------------------------------------------------------------------------------------------------------------|-----------------------|-----------------------|-----------------------|
| Tuve un liqueo de agua en mi hogar que requirió reparación después de un desastre (p. ej., el huracán María).                      | <input type="radio"/> | <input type="radio"/> | <input type="radio"/> |
| Tengo un liqueo continuo DENTRO de mi casa después de un desastre (p. ej., el huracán María).                                      | <input type="radio"/> | <input type="radio"/> | <input type="radio"/> |
| He tenido un liqueo de agua fuera de mi casa en el patio que requirió reparación después de un desastre (p. ej., el huracán María) | <input type="radio"/> | <input type="radio"/> | <input type="radio"/> |
| He tenido un liqueo AFUERA de mi casa después de un desastre (p. ej., el huracán María)                                            | <input type="radio"/> | <input type="radio"/> | <input type="radio"/> |

63. Basado en su salud y bienestar, por favor indique su opinión sobre las siguientes afirmaciones:

| Escala de resiliencia Connor-Davidson (CD-RISC 10)           | Muy en desacuerdo     | En desacuerdo         | Ni de acuerdo ni en desacuerdo | En acuerdo            | Totalmente de acuerdo |
|--------------------------------------------------------------|-----------------------|-----------------------|--------------------------------|-----------------------|-----------------------|
| Puedo adaptarme al cambio.                                   | <input type="radio"/> | <input type="radio"/> | <input type="radio"/>          | <input type="radio"/> | <input type="radio"/> |
| Puedo lidiar con lo que venga.                               | <input type="radio"/> | <input type="radio"/> | <input type="radio"/>          | <input type="radio"/> | <input type="radio"/> |
| Intento ver el lado humorístico de las cosas.                | <input type="radio"/> | <input type="radio"/> | <input type="radio"/>          | <input type="radio"/> | <input type="radio"/> |
| Creo que el estrés puede fortalecerme.                       | <input type="radio"/> | <input type="radio"/> | <input type="radio"/>          | <input type="radio"/> | <input type="radio"/> |
| Tiendo a recuperarme después de una enfermedad o dificultad. | <input type="radio"/> | <input type="radio"/> | <input type="radio"/>          | <input type="radio"/> | <input type="radio"/> |
| Puedo lograr metas a pesar de los obstáculos.                | <input type="radio"/> | <input type="radio"/> | <input type="radio"/>          | <input type="radio"/> | <input type="radio"/> |
| Puedo mantenerme concentrado bajo presión.                   | <input type="radio"/> | <input type="radio"/> | <input type="radio"/>          | <input type="radio"/> | <input type="radio"/> |
| No me desanimo fácilmente por el fracaso.                    | <input type="radio"/> | <input type="radio"/> | <input type="radio"/>          | <input type="radio"/> | <input type="radio"/> |
| Me considero una persona fuerte.                             | <input type="radio"/> | <input type="radio"/> | <input type="radio"/>          | <input type="radio"/> | <input type="radio"/> |
| Puedo manejar sentimientos desagradables.                    | <input type="radio"/> | <input type="radio"/> | <input type="radio"/>          | <input type="radio"/> | <input type="radio"/> |



64. Basado en su salud y bienestar, indique su opinión sobre las siguientes afirmaciones:

| Artículos del Centro de Estudios Epidemiológicos y de Depresión (CES-D)                        | Muy en desacuerdo     | En desacuerdo         | Ni de acuerdo ni en desacuerdo | En acuerdo            | Totalmente de acuerdo |
|------------------------------------------------------------------------------------------------|-----------------------|-----------------------|--------------------------------|-----------------------|-----------------------|
| Me molestan cosas que normalmente no me molestan.                                              | <input type="radio"/> | <input type="radio"/> | <input type="radio"/>          | <input type="radio"/> | <input type="radio"/> |
| No tengo ganas de comer; mi apetito es pobre.                                                  | <input type="radio"/> | <input type="radio"/> | <input type="radio"/>          | <input type="radio"/> | <input type="radio"/> |
| Siento que no puedo deshacerme de la tristeza ni siquiera con la ayuda de mi familia o amigos. | <input type="radio"/> | <input type="radio"/> | <input type="radio"/>          | <input type="radio"/> | <input type="radio"/> |
| Siento que soy tan bueno como otras personas.                                                  | <input type="radio"/> | <input type="radio"/> | <input type="radio"/>          | <input type="radio"/> | <input type="radio"/> |
| Tengo problemas para mantener mi mente en lo que estoy haciendo.                               | <input type="radio"/> | <input type="radio"/> | <input type="radio"/>          | <input type="radio"/> | <input type="radio"/> |
| Me siento deprimido.                                                                           | <input type="radio"/> | <input type="radio"/> | <input type="radio"/>          | <input type="radio"/> | <input type="radio"/> |
| Siento que todo lo que hago requiere esfuerzo.                                                 | <input type="radio"/> | <input type="radio"/> | <input type="radio"/>          | <input type="radio"/> | <input type="radio"/> |
| Siento esperanza en el futuro.                                                                 | <input type="radio"/> | <input type="radio"/> | <input type="radio"/>          | <input type="radio"/> | <input type="radio"/> |
| Pienso que mi vida ha sido un fracaso.                                                         | <input type="radio"/> | <input type="radio"/> | <input type="radio"/>          | <input type="radio"/> | <input type="radio"/> |
| Siento miedo.                                                                                  | <input type="radio"/> | <input type="radio"/> | <input type="radio"/>          | <input type="radio"/> | <input type="radio"/> |
| No puedo dormir bien.                                                                          | <input type="radio"/> | <input type="radio"/> | <input type="radio"/>          | <input type="radio"/> | <input type="radio"/> |
| Soy feliz.                                                                                     | <input type="radio"/> | <input type="radio"/> | <input type="radio"/>          | <input type="radio"/> | <input type="radio"/> |
| Hablo menos de lo habitual.                                                                    | <input type="radio"/> | <input type="radio"/> | <input type="radio"/>          | <input type="radio"/> | <input type="radio"/> |
| Me siento solo.                                                                                | <input type="radio"/> | <input type="radio"/> | <input type="radio"/>          | <input type="radio"/> | <input type="radio"/> |
| La gente es antipática.                                                                        | <input type="radio"/> | <input type="radio"/> | <input type="radio"/>          | <input type="radio"/> | <input type="radio"/> |
| Disfruto la vida.                                                                              | <input type="radio"/> | <input type="radio"/> | <input type="radio"/>          | <input type="radio"/> | <input type="radio"/> |
| Tengo ataques de llanto.                                                                       | <input type="radio"/> | <input type="radio"/> | <input type="radio"/>          | <input type="radio"/> | <input type="radio"/> |
| Me siento triste.                                                                              | <input type="radio"/> | <input type="radio"/> | <input type="radio"/>          | <input type="radio"/> | <input type="radio"/> |
| Siento que la gente no me quiere.                                                              | <input type="radio"/> | <input type="radio"/> | <input type="radio"/>          | <input type="radio"/> | <input type="radio"/> |
| Siento que no puedo comenzar el día.                                                           | <input type="radio"/> | <input type="radio"/> | <input type="radio"/>          | <input type="radio"/> | <input type="radio"/> |

65. Según su comprensión de las experiencias de agua de la comunidad, indique su opinión sobre las siguientes declaraciones:

| Adaptado de desarrollo de la escala corta de conciencia crítica (ShoCCS)                                                                                                                           | Muy en desacuerdo     | En desacuerdo         | Ni de acuerdo ni en desacuerdo | En acuerdo            | Totalmente de acuerdo |
|----------------------------------------------------------------------------------------------------------------------------------------------------------------------------------------------------|-----------------------|-----------------------|--------------------------------|-----------------------|-----------------------|
| Ciertos grupos raciales o étnicos tienen menos posibilidades de acceder a agua potable de alta calidad sin interrupciones del servicio.                                                            | <input type="radio"/> | <input type="radio"/> | <input type="radio"/>          | <input type="radio"/> | <input type="radio"/> |
| Las comunidades de bajos ingresos tienen menos oportunidades de acceder a agua potable de alta calidad sin interrupciones en el servicio.                                                          | <input type="radio"/> | <input type="radio"/> | <input type="radio"/>          | <input type="radio"/> | <input type="radio"/> |
| Las mujeres tienen menos oportunidades de acceder a agua potable de alta calidad sin interrupciones del servicio.                                                                                  | <input type="radio"/> | <input type="radio"/> | <input type="radio"/>          | <input type="radio"/> | <input type="radio"/> |
| Los adultos mayores (65 años o más) tienen menos posibilidades de acceder a agua potable de alta calidad sin interrupciones en el servicio.                                                        | <input type="radio"/> | <input type="radio"/> | <input type="radio"/>          | <input type="radio"/> | <input type="radio"/> |
| He participado en un grupo u organización de derechos civiles para abogar por mejorar el acceso a agua potable de alta calidad sin interrupciones del servicio.                                    | <input type="radio"/> | <input type="radio"/> | <input type="radio"/>          | <input type="radio"/> | <input type="radio"/> |
| He participado en una organización para abogar por mejorar el acceso a agua potable de alta calidad sin interrupciones en el servicio.                                                             | <input type="radio"/> | <input type="radio"/> | <input type="radio"/>          | <input type="radio"/> | <input type="radio"/> |
| Me comuniqué con un funcionario público por teléfono, correo o correo electrónico para decirles cómo se sentía acerca del acceso a agua potable de alta calidad sin interrupciones en el servicio. | <input type="radio"/> | <input type="radio"/> | <input type="radio"/>          | <input type="radio"/> | <input type="radio"/> |
| Me uní a una marcha de protesta, manifestación política o reunión política para abogar por mejorar el acceso a agua potable de alta calidad sin interrupciones del servicio.                       | <input type="radio"/> | <input type="radio"/> | <input type="radio"/>          | <input type="radio"/> | <input type="radio"/> |
| Es importante ser un ciudadano activo e informado en temas de agua como el acceso a agua potable de alta calidad sin interrupciones en el servicio.                                                | <input type="radio"/> | <input type="radio"/> | <input type="radio"/>          | <input type="radio"/> | <input type="radio"/> |
| Es importante corregir la desigualdad social y económica relacionada con el acceso a agua potable de alta calidad sin interrupciones del servicio.                                                 | <input type="radio"/> | <input type="radio"/> | <input type="radio"/>          | <input type="radio"/> | <input type="radio"/> |

|                                                                                                                                                                                                   |   |   |   |   |   |
|---------------------------------------------------------------------------------------------------------------------------------------------------------------------------------------------------|---|---|---|---|---|
| <p>Mi responsabilidad es involucrarme y mejorar las cosas para el acceso de mi sociedad a agua potable de alta calidad sin interrupciones en el servicio.</p>                                     | ○ | ○ | ○ | ○ | ○ |
| <p>Las personas como yo debemos participar en la actividad política y en la toma de decisiones del acceso de nuestro país a agua potable de alta calidad y sin interrupciones en el servicio.</p> | ○ | ○ | ○ | ○ | ○ |

66. **¿Tiene un contador de agua de la Autoridad de Acueductos y Alcantarillados de Puerto Rico (AAA)?** (1) Sí; (2) No; (3) no sé

67. **¿Es usted responsable de su factura de servicios públicos de agua?** (1) Sí; (2) No; (3) No sé

68. **¿Pagas la misma tarifa todos los meses por tus servicios de agua no importa la cantidad que uses de la Autoridad de Acueductos y Alcantarillados de Puerto Rico (AAA)?** (1) Sí; (2) No; (3) No sé

69. **¿Cuánto paga mensualmente por el servicio de agua de la Autoridad de Acueductos y Alcantarillados de Puerto Rico?** \_\_\_\_\_ dólares

70. **¿Cómo ha cambiado su factura de agua en la última década?** (1) Ningún cambio notable; (2) mi factura de agua ha aumentado; (3) mi factura de agua ha disminuido

71. **Con las tarifas actuales, ¿le preocupa tener la capacidad (es decir, tener los recursos financieros) para pagar su factura de agua?**

(1) Nada de preocupado; (2) Casi nada de preocupado; (3) Un poco preocupado (4) Moderadamente preocupado; (4) Muy preocupado; (5) Extremadamente preocupado

72. **¿Cuánto MÁS estaría dispuesto a pagar por una mayor confiabilidad (específicamente, presión y menos interrupciones) de su servicio de AGUA? Responda "0" si no estaría dispuesto a pagar más por su servicio de agua por un sistema más confiable**

\_\_\_\_\_ USD de aumento en la factura actual del agua

73. **¿Cuánto MÁS estaría dispuesto a pagar por una mejor calidad (olor, color, sabor, etc.) de su servicio de AGUA? Responda "0" si no estaría dispuesto a pagar más por su servicio de agua por un sistema más confiable**

\_\_\_\_\_ USD de aumento en la factura actual del agua

74. **¿Recibo información sobre la distribución y la calidad del agua a través de (elijan todas las que correspondan)?** (1) Vecinos, familiares, amigos; (2) organizaciones vecinales en mi vecindario (incluidos grupos de iglesias locales); (3) organizaciones sin fines de lucro fuera de mi vecindario; (4) gobierno local; (5) gobierno central; (6) agencias federales; (7) volantes/avisos en el vecindario; (8) Periódico, TV, Radio; (9) Internet (Facebook u otras redes sociales) (10) Otro, por favor especifiqué

\_\_\_\_\_ (11) No recibí noticias

75. **¿Que métodos son efectivos para obtener información sobre la distribución y la calidad del agua (seleccione todos los que correspondan)?**  
(1) Vecinos, familiares, amigos; (2) organizaciones vecinales en mi vecindario (incluidos grupos de iglesias locales); (3) organizaciones sin fines de lucro fuera de mi vecindario; (4) gobierno local; (5) gobierno central; (6) agencias federales; (7) volantes/avisos en el vecindario; (8) Periódico, TV, Radio; (9) Internet (Facebook u otras redes sociales) (10) Otro, por favor especifique \_\_\_\_\_ (11) No recibo noticias
76. **¿Es la efectividad actual de proporcionarme información sobre la distribución de agua de la empresa de servicios públicos?**  
(1) Extremadamente ineficaz; (2) No efectivo; (3) Neutro; (4) Efectivo; (5) Muy eficaz; (6) No sé
77. **Además de los métodos anteriores, preferiría recibir información a través de (por ejemplo, aplicación de teléfono): \_\_\_\_\_**

---

**PREGUNTAS DEMOGRÁFICAS**

**Género:** (1) Femenino (2) Masculino (3) Otros/No binario, especifique: \_\_\_\_\_

**¿Cuál es tu edad?** \_\_\_\_\_

**¿Eres de origen hispano, latino o español?**

(1) no de origen hispano, latino o español; (2) Sí, puertorriqueño; (3) Sí, haitiano; (4) Sí, dominicano; (5) Sí, cubano; (6) Otro (especificar) \_\_\_\_\_

**¿Cuál es su raza identificada (elija todas las que correspondan)?**

(1) indio americano o nativo de Alaska; (2) asiático; (3) negro o afroamericano; (4) nativo de Hawái u otras islas del Pacífico; (5) Blanco; (6) mixto; (7) Otro \_\_\_\_\_

**¿Hace cuánto vive en este municipio?** \_\_\_\_\_ años

---

**¿Cuál es el nivel educativo más alto completado?**

(1) sin escolaridad completa; (2) título de escuela primaria; (3) título de escuela intermedia; (4) diploma de escuela secundaria o equivalente (por ejemplo: GED); (5) Licenciatura (por ejemplo: BA, BS); (6) título de asociado (por ejemplo: AA, AS); (7) Otro (por favor especifique) \_\_\_\_\_

**¿Cuántas personas viven en su hogar?** \_\_\_\_\_

**¿Cuántos niños menores de 18 años viven en su hogar?** \_\_\_\_\_

**¿Cuántos niños menores de 5 años viven en su hogar?** \_\_\_\_\_

**¿Cuántos autos tiene su hogar?** \_\_\_\_\_

**¿Cómo describirías tu casa?**

**(1)** Casa; **(2)** Apartamento; **(3)** Condominio; **(4)** Casa móvil/Remolque; **(5)** Otro \_\_\_\_\_

**¿Es tu casa...?**

**(1)** De su propiedad o de alguien en este hogar con una hipoteca o préstamo; **(2)** De su propiedad o de alguien en este hogar libre y claro (sin hipoteca o préstamo); **(3)** Alquilado; **(4)** Otro \_\_\_\_\_

**¿Tu casa tiene título de propiedad?**

**(1)** Sí; **(2)** No; **(3)** No sé

**Si no, por favor seleccione el más apropiado**

**(1)** Herencia no resuelta **(2)** Terreno familiar sin subdividir formalmente; **(3)** tierra de rescate privado; **(4)** terrenos del gobierno; **(5)** Otros (especificar)

**¿Es esta la primera casa que ha tenido? (1) Sí; (2) Sí**

En caso **afirmativo**, y esta es la primera casa que ha tenido, **¿cuánto tiempo ha tenido esta casa?**

\_\_\_\_\_ años

**Ingreso mensual aproximado:**

\$ \_\_\_\_\_ al mes

**¿Cuál es su situación laboral (elija todas las que correspondan)?**

**(1)** Empleado por sueldo o salario; **(2)** Trabajador por Cuenta Propia; **(3)** Sin trabajo y buscando trabajo; **(4)** Sin trabajo, pero actualmente no buscando trabajo; **(5)** un ama de casa; **(6)** un estudiante; **(7)** Jubilado; **(8)** Incapaz de trabajar

**¿Cuál es su principal fuente de noticias (elija todas las que correspondan)?**

**(1)** Periódico; **(2)** Internet; **(3)** Televisión; **(4)** Radio; **(5)** Redes sociales; **(6)** Otro \_\_\_\_\_

**Frecuencia de seguimiento de cualquiera de las fuentes de noticias anteriores:**

**(1)** Al menos una vez al día; **(2)** Al menos una vez por semana; **(3)** Al menos una vez al mes; **(4)** Nunca

**¿Tiene algún comentario o inquietud sobre el suministro y la calidad del agua en su ciudad?**
